# Supplementary material for: Anti-Hyperglycemic Activity of Major Compounds from Calea ternifolia
Source: PubMed Central journal article supplement (PMC6155573; doi:10.3390/molecules22020289), 2017-02-14
Supplement: molecules-22-00289-s001.pdf [file molecules-22-00289-s001.pdf]

## Supplementary Material: Anti-Hyperglycemic Activity of Major Compounds from *Calea ternifolia*

Sonia Escandón-Rivera, Araceli Pérez-Vásquez, Andrés Navarrete, Mariana Hernández, Edelmira Linares, Robert Bye and Rachel Mata

Table S1. Crystal data and structure refinement for Calein C.

| Identification Code                                   | 172XYZ13 (Solved by: R.A. Toscano)                                               |
|-------------------------------------------------------|----------------------------------------------------------------------------------|
| Empirical formula                                     | C <sub>21</sub> H <sub>26</sub> O <sub>8</sub>                                   |
| Formula weight                                        | 406.42                                                                           |
| Temperature                                           | 298(2) K                                                                         |
| Wavelength                                            | 0.71073 Å                                                                        |
| Crystal system                                        | Orthorhombic                                                                     |
| Space group                                           | P 21 21 21                                                                       |
| Unit cell dimensions                                  | a = 10.1880(3) Å a = 90°<br>b = 12.3924(4) Å b = 90°<br>c = 17.8199(6) Å g = 90° |
| Volume                                                | 2249.83(12) Å <sup>3</sup>                                                       |
| Z                                                     | 4                                                                                |
| Density (calculated)                                  | 1.200 Mg/m <sup>3</sup>                                                          |
| Absorption coefficient                                | 0.092 mm <sup>-1</sup>                                                           |
| F (000)                                               | 864                                                                              |
| Crystal size/colour/shape                             | 0.316 × 0.216 × 0.212 mm/colourless/block                                        |
| <b>Theta Range for Data Collection 2.00 to 28.28°</b> |                                                                                  |
| Index ranges                                          | -13 ≤ h ≤ 12, -16 ≤ k ≤ 16, -22 ≤ l ≤ 23                                         |
| Reflections collected                                 | 22646                                                                            |
| Independent reflections                               | 5585 [R (int) = 0.0524]                                                          |
| Completeness to theta                                 | 28.28° 100.0%                                                                    |
| Measurement device                                    | Bruker Smart Apex CCD diffractometer 01-670-01                                   |
| Absorption correction                                 | Semi-empirical from equivalents                                                  |
| Max. and min. transmission                            | 0.7457 and 0.6676                                                                |
| Refinement method                                     | Full-matrix least-squares on F <sup>2</sup>                                      |
| Data/restraints/parameters                            | 5585/1045/535                                                                    |
| Goodness-of-fit on F <sup>2</sup>                     | 1.035                                                                            |
| Final R indices                                       | [I > 2σ (I)] R 1 = 0.0670, wR 2 = 0.1847                                         |
| R indices (all data)                                  | R 1 = 0.1336, wR 2 = 0.2349                                                      |
| <b>Absolute Structure Parameter?</b>                  |                                                                                  |
| Largest diff. peak and hole                           | 0.236 and -0.284 e.Å <sup>-3</sup>                                               |

**Table S2.** Atomic coordinates ( $\times 10^4$ ) and equivalent isotropic displacement parameters ( $\text{\AA}^2 \times 10^3$ ) for calcein C (5). U (eq) is defined as one third of the trace of the orthogonalized  $U_{ij}$  tensor.

|        | x        | y        | z        | U(eq)  |
|--------|----------|----------|----------|--------|
| O(1)   | 5732(5)  | 5938(4)  | 5448(3)  | 83(1)  |
| O(2)   | 3793(5)  | 2461(4)  | 7094(3)  | 75(1)  |
| O(3)   | 1842(5)  | 4142(5)  | 6939(3)  | 61(1)  |
| O(4)   | 1218(5)  | 5735(4)  | 6000(4)  | 92(2)  |
| O(5)   | 3640(8)  | 6914(6)  | 5986(4)  | 90(2)  |
| O(6)   | 3814(6)  | 2444(5)  | 8308(3)  | 107(2) |
| O(7)   | 1310(8)  | 5132(6)  | 7968(3)  | 83(2)  |
| O(8)   | 164(9)   | 4379(7)  | 5346(6)  | 154(4) |
| C(1)   | 4694(7)  | 5518(5)  | 5268(3)  | 67(1)  |
| C(2)   | 4627(9)  | 4513(5)  | 4802(4)  | 79(1)  |
| C(3)   | 5340(8)  | 3622(6)  | 4982(4)  | 80(2)  |
| C(4)   | 6233(6)  | 3477(5)  | 5630(4)  | 74(1)  |
| C(5)   | 5587(6)  | 2801(5)  | 6235(4)  | 75(1)  |
| C(6)   | 4221(6)  | 3178(5)  | 3178(5)  | 63(1)  |
| C(7)   | 4167(5)  | 4328(4)  | 6813(3)  | 56(1)  |
| C(8)   | 2854(5)  | 4901(5)  | 6703(3)  | 56(1)  |
| C(9)   | 2475(5)  | 5229(5)  | 5912(3)  | 65(1)  |
| C(10)  | 3408(7)  | 6037(5)  | 5502(3)  | 71(1)  |
| C(11)  | 4395(6)  | 4068(5)  | 7632(3)  | 69(1)  |
| C(12)  | 3917(6)  | 2949(5)  | 7769(3)  | 80(2)  |
| C(13)  | 4831(9)  | 4684(7)  | 8164(4)  | 97(3)  |
| C(14)  | 2735(9)  | 6464(6)  | 4778(4)  | 105(2) |
| C(15)  | 7531(7)  | 2927(7)  | 5375(6)  | 110(2) |
| C(16)  | 1125(6)  | 4381(6)  | 7564(3)  | 82(2)  |
| C(17)  | 59(9)    | 3563(8)  | 7670(6)  | 109(2) |
| C(18)  | -802(11) | 3687(13) | 8268(8)  | 159(5) |
| C(19)  | -40(15)  | 2681(10) | 7176(8)  | 157(4) |
| C(20)  | 123(7)   | 5156(7)  | 5742(4)  | 128(2) |
| C(21)  | -1144(8) | 5669(10) | 6049(8)  | 170(4) |
| O(1B)  | 5165(11) | 6319(10) | 5229(6)  | 95(3)  |
| O(2B)  | 4037(11) | 2453(8)  | 2453(8)  | 78(2)  |
| O(3B)  | 2038(12) | 4097(10) | 7091(7)  | 72(2)  |
| O(4B)  | 959(8)   | 5523(9)  | 6169(6)  | 88(2)  |
| O(5B)  | 3389(14) | 6966(11) | 6210(8)  | 89(4)  |
| O(6B)  | 4487(16) | 2159(9)  | 7950(7)  | 123(4) |
| O(7B)  | 1037(18) | 5392(12) | 7769(9)  | 103(4) |
| O(8B)  | 503(13)  | 4576(13) | 5070(8)  | 102(3) |
| C(1B)  | 4099(12) | 5881(9)  | 5165(6)  | 74(2)  |
| C(2B)  | 3873(13) | 4932(9)  | 4932(9)  | 81(2)  |
| C(3B)  | 4662(14) | 4044(10) | 4696(7)  | 85(2)  |
| C(4B)  | 5810(11) | 3837(12) | 5172(7)  | 87(2)  |
| C(5B)  | 5481(12) | 3058(10) | 5804(7)  | 87(2)  |
| C(6B)  | 4235(11) | 3313(9)  | 6237(5)  | 69(2)  |
| C(7B)  | 4261(9)  | 4370(7)  | 6697(5)  | 60(2)  |
| C(8B)  | 2902(9)  | 4909(9)  | 6756(6)  | 58(2)  |
| C(9B)  | 2301(8)  | 5262(9)  | 6035(6)  | 69(2)  |
| C(10B) | 2957(11) | 6265(8)  | 5644(6)  | 72(2)  |
| C(11B) | 4693(12) | 3961(8)  | 7447(6)  | 76(2)  |
| C(12B) | 4348(12) | 2795(8)  | 7497(6)  | 80(2)  |
| C(13B) | 5282(16) | 4473(11) | 7989(8)  | 84(4)  |
| C(14B) | 1952(15) | 6837(12) | 5139(9)  | 106(4) |
| C(15B) | 6988(13) | 3391(15) | 4719(9)  | 124(4) |
| C(16B) | 1052(11) | 4492(12) | 7529(6)  | 86(2)  |
| C(17B) | -1(14)   | 3687(16) | 7673(10) | 106(3) |

|        |           |          |          |        |
|--------|-----------|----------|----------|--------|
| C(18B) | -1073(17) | 4020(20) | 8109(13) | 121(5) |
| C(19B) | 90(20)    | 2633(16) | 7393(14) | 128(5) |
| C(20B) | 176(10)   | 5231(10) | 5514(7)  | 106(3) |
| C(21B) | -1066(13) | 5893(15) | 5520(12) | 126(5) |

**Table S3.** Bond lengths [Å] and angles [°] for calein C (5).

| <b>O(1)-C(1)</b>  | <b>1.223(7)</b> | <b>O(1B) -C(1B)</b>  | <b>1.220(10)</b> |
|-------------------|-----------------|----------------------|------------------|
| O(2)-C(12)        | 1.352(7)        | O(2B) -C(12B)        | 1.362(9)         |
| O(2) -C(6)        | 1.480(6)        | O(2B) -C(6B)         | 1.469(9)         |
| O(3) -C(16)       | 1.364(6)        | O(3B) -C(16B)        | 1.363(8)         |
| O(3) -C(8)        | 1.458(5)        | O(3B) -C(8B)         | 1.464(8)         |
| O(4) -C(20)       | 1.404(8)        | O(4B) -C(9B)         | 1.425(9)         |
| O(4) -C(9)        | 1.435(6)        | O(4B) -C(20B)        | 1.460(10)        |
| O(5) -C(10)       | 1.406(7)        | O(5B) -C(10B)        | 1.402(9)         |
| O(6) -C(12)       | 1.152(6)        | O(6B) -C(12B)        | 1.137(8)         |
| O(7) -C(16)       | 1.191(6)        | O(7B) -C(16B)        | 1.194(8)         |
| O(8) -C(20)       | 1.195(8)        | O(8B) -C(20B)        | 1.182(10)        |
| C(1) -C(2)        | 1.498(8)        | C(1B) -C(2B)         | 1.495(10)        |
| C(1) -C(10)       | 1.518(9)        | C(1B) -C(10B)        | 1.519(11)        |
| C(2) -C(3)        | 1.360(12)       | C(2B) -C(3B)         | 1.364(14)        |
| C(3) -C(4)        | 1.481(11)       | C(3B) -C(4B)         | 1.467(14)        |
| C(4) -C(5)        | 1.516(9)        | C(4B) -C(5B)         | 1.520(12)        |
| C(4) -C(15)       | 1.556(8)        | C(4B) -C(15B)        | 1.548(11)        |
| C(5) -C(6)        | 1.530(7)        | C(5B) -C(6B)         | 1.519(10)        |
| C(6) -C(7)        | 1.547(6)        | C(6B) -C(7B)         | 1.546(8)         |
| C(7) -C(11)       | 1.512(6)        | C(7B) -C(11B)        | 1.496(8)         |
| C(7) -C(8)        | 1.527(5)        | C(7B) -C(8B)         | 1.541(8)         |
| C(8) -C(9)        | 1.517(6)        | C(8B) -C(9B)         | 1.488(8)         |
| C(9) -C(10)       | 1.562(7)        | C(9B) -C(10B)        | 1.573(9)         |
| C(10) -C(14)      | 1.555(8)        | C(10B) -C(14B)       | 1.536(11)        |
| C(11) -C(13)      | 1.296(7)        | C(11B) -C(13B)       | 1.302(9)         |
| C(11) -C(12)      | 1.489(8)        | C(11B) -C(12B)       | 1.490(9)         |
| C(16) -C(17)      | 1.498(8)        | C(16B) -C(17B)       | 1.488(9)         |
| C(17) -C(18)      | 1.389(9)        | C(17B) -C(19B)       | 1.401(11)        |
| C(17) -C(19)      | 1.407(9)        | C(17B) -C(18B)       | 1.404(11)        |
| C(20) -C(21)      | 1.539(10)       | C(20B) -C(21B)       | 1.508(11)        |
| C(12) -O(2) -C(6) | 111.4(4)        | C(10) -O(5) -H(5)    | 127(5)           |
| C(16) -O(3) -C(8) | 118.3(4)        | O(1) -C(1) -C(2)     | 122.6(7)         |
| C(20) -O(4) -C(9) | 116.7(5)        | O(1) -C(1) -C(10)    | 119.6(5)         |
| C(2) -C(1) -C(10) | 117.8(6)        | C(19) -C(17) -C(16)  | 119.9(6)         |
| C(3) -C(2) -C(1)  | 121.3(7)        | O(8) -C(20) -O(4)    | 125.3(7)         |
| C(2) -C(3) -C(4)  | 127.6(6)        | O(8) -C(20) -C(21)   | 124.9(7)         |
| C(3) -C(4) -C(5)  | 110.8(5)        | O(4) -C(20) -C(21)   | 109.8(6)         |
| C(3) -C(4) -C(15) | 110.3(6)        | C(12B) -O(2B) -C(6B) | 111.3(6)         |
| C(5) -C(4) -C(15) | 109.5(6)        | C(16B) -O(3B) -C(8B) | 115.4(8)         |
| C(4) -C(5) -C(6)  | 115.2(5)        | C(9B) -O(4B) -C(20B) | 109.5(7)         |
| O(2) -C(6) -C(5)  | 107.1(5)        | C(10B) -O(5B) -H(5)  | 114(4)           |
| O(2) -C(6) -C(7)  | 104.8(4)        | O(1B) -C(1B) -C(2B)  | 122.9(9)         |
| C(5) -C(6) -C(7)  | 115.0(4)        | O(1B) -C(1B) -C(10B) | 119.4(8)         |
| C(11) -C(7) -C(8) | 110.9(4)        | C(2B) -C(1B) -C(10B) | 117.6(8)         |
| C(11) -C(7) -C(6) | 99.9(4)         | C(3B) -C(2B) -C(1B)  | 121.2(10)        |
| C(8) -C(7) -C(6)  | 114.2(4)        | C(2B) -C(3B) -C(4B)  | 129.5(10)        |
| O(3) -C(8) -C(9)  | 105.1(4)        | C(3B) -C(4B) -C(5B)  | 111.3(9)         |
| O(3) -C(8) -C(7)  | 106.4(3)        | C(3B) -C(4B) -C(15B) | 112.3(10)        |
| C(9) -C(8) -C(7)  | 117.8(4)        | C(5B) -C(4B) -C(15B) | 109.3(9)         |
| O(4) -C(9) -C(8)  | 104.0(4)        | C(6B) -C(5B) -C(4B)  | 115.4(8)         |
| O(4) -C(9) -C(10) | 108.3(4)        | O(2B) -C(6B) -C(5B)  | 107.9(8)         |

|                       |          |                        |           |
|-----------------------|----------|------------------------|-----------|
| C(8) -C(9) -C(10)     | 116.8(4) | O(2B) -C(6B) -C(7B)    | 105.1(5)  |
| O(5) -C(10) -C(1)     | 110.5(5) | C(5B) -C(6B) -C(7B)    | 115.5(7)  |
| O(5) -C(10) -C(14)    | 108.7(5) | C(11B) -C(7B) -C(8B)   | 110.5(7)  |
| C(1) -C(10) -C(14)    | 107.2(6) | C(11B) -C(7B) -C(6B)   | 101.0(5)  |
| O(5) -C(10) -C(9)     | 108.2(5) | C(8B) -C(7B) -C(6B)    | 112.8(6)  |
| C(1) -C(10) -C(9)     | 112.4(5) | O(3B) -C(8B) -C(9B)    | 107.9(7)  |
| C(14) -C(10) -C(9)    | 109.7(5) | O(3B) -C(8B) -C(7B)    | 105.7(6)  |
| C(13) -C(11) -C(12)   | 122.7(5) | C(9B) -C(8B) -C(7B)    | 116.0(7)  |
| C(13) -C(11) -C(7)    | 129.3(5) | O(4B) -C(9B) -C(8B)    | 108.5(7)  |
| C(12) -C(11) -C(7)    | 107.9(4) | O(4B) -C(9B) -C(10B)   | 107.6(7)  |
| O(6) -C(12) -O(2)     | 119.4(6) | C(8B) -C(9B) -C(10B)   | 116.1(7)  |
| O(6) -C(12) -C(11)    | 132.3(6) | O(5B) -C(10B) -C(1B)   | 110.9(7)  |
| O(2) -C(12) -C(11)    | 107.5(4) | O(5B) -C(10B) -C(14B)  | 110.1(8)  |
| O(7) -C(16) -O(3)     | 125.4(5) | C(1B) -C(10B) -C(14B)  | 109.0(8)  |
| O(7) -C(16) -C(17)    | 124.5(5) | O(5B) -C(10B) -C(9B)   | 107.7(7)  |
| O(3) -C(16) -C(17)    | 110.1(5) | C(1B) -C(10B) -C(9B)   | 109.1(7)  |
| C(18) -C(17) -C(19)   | 121.4(7) | C(14B) -C(10B) -C(9B)  | 109.9(7)  |
| C(18) -C(17) -C(16)   | 118.7(7) | C(13B) -C(11B) -C(12B) | 122.5(8)  |
| C(13B) -C(11B) -C(7B) | 129.3(8) | O(3B) -C(16B) -C(17B)  | 112.9(7)  |
| C(12B) -C(11B) -C(7B) | 108.2(5) | C(19B) -C(17B) -C(18B) | 121.8(9)  |
| O(6B) -C(12B) -O(2B)  | 117.8(9) | C(19B) -C(17B) -C(16B) | 121.1(8)  |
| O(6B) -C(12B) -C(11B) | 133.3(9) | C(18B) -C(17B) -C(16B) | 117.1(8)  |
| O(2B) -C(12B) -C(11B) | 107.6(6) | O(8B) -C(20B) -O(4B)   | 123.5(8)  |
| O(7B) -C(16B) -O(3B)  | 123.4(8) | O(8B) -C(20B) -C(21B)  | 128.0(10) |
| O(7B) -C(16B) -C(17B) | 123.8(8) | O(4B) -C(20B) -C(21B)  | 108.5(8)  |

**Table S4.** Hydrogen coordinates ( $\times 10^4$ ) and isotropic displacement parameters ( $\text{\AA}^2 \times 10^3$ ) for calein C (5).

|        | x        | y        | z        | (eq) |
|--------|----------|----------|----------|------|
| H(5)   | 4320(70) | 7040(50) | 6240(30) | 135  |
| H(2)   | 4088     | 4499     | 4381     | 95   |
| H(3)   | 5258     | 3035     | 4660     | 96   |
| H(4)   | 6442     | 4188     | 5839     | 89   |
| H(5A)  | 6154     | 2796     | 6672     | 90   |
| H(5B)  | 5521     | 2064     | 6056     | 90   |
| H(6)   | 3609     | 3122     | 6054     | 76   |
| H(7)   | 4887     | 4770     | 6616     | 67   |
| H(8)   | 2823     | 5538     | 7028     | 68   |
| H(9)   | 2375     | 4579     | 5603     | 78   |
| H(13A) | 4855     | 4432     | 8655     | 117  |
| H(13B) | 5120     | 5378     | 8055     | 117  |
| H(14A) | 3373     | 6822     | 4470     | 157  |
| H(14B) | 2053     | 6963     | 4911     | 157  |
| H(14C) | 2363     | 5869     | 4505     | 157  |
| H(15A) | 8088     | 2816     | 5802     | 165  |
| H(15B) | 7971     | 3380     | 5018     | 165  |
| H(15C) | 7335     | 2244     | 5147     | 165  |
| H(18A) | -1461    | 3181     | 8348     | 8348 |
| H(18B) | -720     | 4277     | 8587     | 191  |
| H(19A) | -754     | 2226     | 7329     | 235  |
| H(19B) | 764      | 2276     | 7186     | 235  |
| H(19C) | -196     | 2939     | 6676     | 235  |
| H(21A) | -1776    | 5731     | 5652     | 254  |
| H(21B) | -951     | 6373     | 6245     | 254  |
| H(21C) | -1495    | 5224     | 6441     | 254  |
| H(2B)  | 3181     | 4948     | 4323     | 98   |
| H(3B)  | 4439     | 3488     | 4369     | 102  |
| H(4B)  | 6078     | 4523     | 5398     | 105  |
| H(5C)  | 5401     | 2339     | 5594     | 104  |
| H(5D)  | 6211     | 3048     | 6154     | 104  |
| H(6B)  | 3488     | 3327     | 5890     | 83   |
| H(7B)  | 4908     | 4875     | 6491     | 72   |
| H(8B)  | 2962     | 5530     | 7095     | 70   |
| H(9B)  | 2331     | 4654     | 5684     | 82   |

|        |       |      |      |     |
|--------|-------|------|------|-----|
| H(13C) | 5503  | 4110 | 8428 | 101 |
| H(13D) | 5481  | 5202 | 7938 | 101 |
| H(14D) | 2371  | 7424 | 4882 | 159 |
| H(14E) | 1247  | 7111 | 5441 | 159 |
| H(14F) | 1611  | 6334 | 4779 | 159 |
| H(15D) | 7428  | 3975 | 4470 | 186 |
| H(15E) | 6677  | 2884 | 4352 | 186 |
| H(15F) | 7588  | 3037 | 5053 | 186 |
| H(18C) | -1747 | 3545 | 8219 | 145 |
| H(18D) | -1109 | 4729 | 8288 | 145 |
| H(19D) | -672  | 2230 | 7541 | 192 |
| H(19E) | 863   | 2292 | 7591 | 192 |
| H(19F) | 143   | 2655 | 6855 | 192 |
| H(21D) | -1673 | 5591 | 5874 | 189 |
| H(21E) | -1451 | 5888 | 5028 | 189 |
| H(21F) | -863  | 6622 | 5661 | 189 |

**Table S5.** Hydrogen bonds for calcin C (5).

| D-H...A            | d(D-H)  | d(H...A) | d(D...A) | <(DHA) |
|--------------------|---------|----------|----------|--------|
| O(5)-H(5)...O(6)#1 | 0.84(6) | 2.12(7)  | 2.956(9) | 170(6) |

Symmetry transformations used to generate equivalent atoms: #1  $-x + 1, y + 1/2, -z + 3/2$ .

**Table S6.** Effect of calcin A (4) on blood glucose levels in normoglycemic and NA/STZ mice during an OSTT <sup>a</sup>.

| Test Samples<br>(mg/Kg of BW) | Blood Glucose Concentration (mg/dL) |            |            |            |            |          |
|-------------------------------|-------------------------------------|------------|------------|------------|------------|----------|
|                               | 0 h                                 | 0.5 h      | 1 h        | 1.5 h      | 2 h        | 3 h      |
| <b>Normal Mice</b>            |                                     |            |            |            |            |          |
| Vehicle                       | 121 ± 2                             | 200 ± 7    | 137 ± 8    | 140 ± 8    | 124 ± 6    | 106 ± 9  |
| Acarbose (5)                  | 124 ± 10                            | 148 ± 5 *  | 156 ± 4    | 136 ± 10   | 119 ± 5    | 120 ± 9  |
| 1 (3.16)                      | 122 ± 5                             | 152 ± 5 *  | 153 ± 7    | 154 ± 8    | 160 ± 7    | 127 ± 6  |
| 2 (7)                         | 123 ± 4                             | 144 ± 6 *  | 163 ± 8    | 164 ± 6    | 127 ± 5    | 117 ± 3  |
| 3 (10)                        | 120 ± 12                            | 133 ± 17 * | 130 ± 22   | 130 ± 14   | 134 ± 15   | 113 ± 11 |
| <b>NA/STZ Mice</b>            |                                     |            |            |            |            |          |
| Vehicle                       | 192 ± 6                             | 371 ± 10   | 312 ± 11   | 287 ± 12   | 258 ± 12   | 213 ± 11 |
| Acarbose (5)                  | 197 ± 10                            | 225 ± 11 * | 221 ± 13 * | 210 ± 14 * | 205 ± 12 * | 187 ± 14 |
| 1 (3.16)                      | 215 ± 15                            | 250 ± 19 * | 223 ± 23 * | 220 ± 21 * | 223 ± 29   | 188 ± 18 |
| 2 (7)                         | 189 ± 21                            | 189 ± 13 * | 187 ± 13 * | 197 ± 18 * | 202 ± 23   | 178 ± 12 |
| 3 (10)                        | 202 ± 22                            | 262 ± 25 * | 234 ± 26 * | 231 ± 24 * | 229 ± 22   | 217 ± 18 |

<sup>a</sup> Each value is the mean ± SEM for six mice in each group. \*  $p < 0.05$  significantly different ANOVA followed by Dunnett's t test for comparison with respect to control group.

**Table S7.** Effect of calcin C (5) on blood glucose levels in normoglycemic and NA/STZ mice during an OSTT <sup>a</sup>.

| Test Samples<br>(mg/Kg of BW) | Blood Glucose Concentration (mg/dL) |            |            |            |            |          |
|-------------------------------|-------------------------------------|------------|------------|------------|------------|----------|
|                               | 0 h                                 | 0.5 h      | 1 h        | 1.5 h      | 2 h        | 3 h      |
| <b>Normal Mice</b>            |                                     |            |            |            |            |          |
| Vehicle                       | 121 ± 2                             | 200 ± 7    | 137 ± 8    | 140 ± 8    | 124 ± 6    | 106 ± 9  |
| Acarbose (5)                  | 124 ± 8                             | 148 ± 5 *  | 156 ± 4    | 136 ± 10   | 119 ± 5    | 120 ± 9  |
| 1 (3.16)                      | 129 ± 2                             | 169 ± 4 *  | 148 ± 7    | 146 ± 7    | 133 ± 7    | 125 ± 4  |
| 2 (7)                         | 125 ± 5                             | 171 ± 8 *  | 160 ± 3    | 158 ± 4    | 144 ± 5    | 129 ± 5  |
| 3 (10)                        | 118 ± 9                             | 149 ± 10 * | 157 ± 7    | 139 ± 9    | 124 ± 5    | 120 ± 4  |
| <b>NA/STZ Mice</b>            |                                     |            |            |            |            |          |
| Vehicle                       | 218 ± 24                            | 355 ± 14   | 292 ± 15   | 274 ± 13   | 250 ± 10   | 215 ± 12 |
| Acarbose (5)                  | 197 ± 10                            | 225 ± 11 * | 221 ± 13 * | 210 ± 14 * | 205 ± 12   | 187 ± 14 |
| 1 (3.16)                      | 195 ± 5                             | 289 ± 16 * | 238 ± 18 * | 223 ± 10 * | 223 ± 15   | 186 ± 12 |
| 2 (7)                         | 229 ± 18                            | 246 ± 16 * | 211 ± 17 * | 187 ± 8 *  | 193 ± 13 * | 192 ± 10 |

|        |          |            |          |          |          |          |
|--------|----------|------------|----------|----------|----------|----------|
| 3 (10) | 199 ± 12 | 276 ± 20 * | 249 ± 14 | 237 ± 12 | 251 ± 24 | 243 ± 20 |
|--------|----------|------------|----------|----------|----------|----------|

<sup>a</sup> Each value is the mean ± SEM for six mice in each group. \*  $p < 0.05$  significantly different ANOVA followed by Dunnett's t test for comparison with respect to control group.

**Table S8.** Effect of chromene 1 on blood glucose levels in normoglycemic and NA/STZ mice during an OSTT <sup>a</sup>.

| Blood Glucose Concentration (mg/dL) |          |            |            |            |            |          |
|-------------------------------------|----------|------------|------------|------------|------------|----------|
| Test Samples (mg/Kg of BW)          | 0 h      | 0.5 h      | 1 h        | 1.5 h      | 2 h        | 3 h      |
| <b>Normal Mice</b>                  |          |            |            |            |            |          |
| Vehicle                             | 121 ± 2  | 200 ± 7    | 137 ± 8    | 140 ± 8    | 124 ± 6    | 106 ± 9  |
| Acarbose (5)                        | 124 ± 8  | 148 ± 5 *  | 156 ± 4    | 136 ± 10   | 119 ± 5    | 120 ± 9  |
| 1 (5.6)                             | 113 ± 1  | 165 ± 10 * | 120 ± 7    | 115 ± 5    | 133 ± 5    | 99 ± 5   |
| 2 (10)                              | 125 ± 2  | 163 ± 9 *  | 123 ± 5    | 120 ± 9    | 125 ± 8    | 117 ± 9  |
| 3 (31.6)                            | 123 ± 3  | 176 ± 6 *  | 135 ± 7    | 131 ± 7    | 119 ± 7    | 112 ± 7  |
| <b>NA/STZ Mice</b>                  |          |            |            |            |            |          |
| Vehicle                             | 192 ± 6  | 371 ± 10   | 312 ± 11   | 287 ± 12   | 258 ± 12   | 213 ± 11 |
| Acarbose (5)                        | 197 ± 10 | 225 ± 11 * | 221 ± 13 * | 210 ± 14 * | 205 ± 12 * | 187 ± 14 |
| 1 (5.6)                             | 199 ± 18 | 290 ± 13 * | 248 ± 11 * | 247 ± 9    | 246 ± 9    | 225 ± 11 |
| 2 (10)                              | 190 ± 18 | 259 ± 18 * | 247 ± 14 * | 245 ± 16   | 256 ± 18   | 226 ± 12 |
| 3 (31.6)                            | 174 ± 10 | 240 ± 16 * | 241 ± 12 * | 245 ± 13   | 248 ± 18   | 215 ± 16 |

<sup>a</sup> Each value is the mean ± SEM for six mice in each group. \*  $p < 0.05$  significantly different ANOVA followed by Dunnett's t test for comparison with respect to control group.

**Table S9.** Effect of essential oil of *C. ternifolia* on blood glucose levels in normoglycemic and NA/STZ mice during an OSTT <sup>a</sup>.

| Blood Glucose Concentration (mg/dL) |          |            |            |            |            |            |
|-------------------------------------|----------|------------|------------|------------|------------|------------|
| Test Samples (mg/Kg of BW)          | 0 h      | 0.5 h      | 1 h        | 1.5 h      | 2 h        | 3 h        |
| <b>Normal Mice</b>                  |          |            |            |            |            |            |
| Vehicle                             | 127 ± 6  | 200 ± 7    | 146 ± 9    | 150 ± 11   | 140 ± 11   | 118 ± 10   |
| Acarbose (5)                        | 141 ± 8  | 169 ± 7 *  | 149 ± 7    | 153 ± 5    | 142 ± 5    | 118 ± 6    |
| 1 (31.6)                            | 137 ± 5  | 154 ± 6 *  | 160 ± 3    | 145 ± 5    | 130 ± 6    | 118 ± 5    |
| 2 (100)                             | 137 ± 5  | 159 ± 10 * | 151 ± 8    | 136 ± 9    | 137 ± 10   | 115 ± 7    |
| 3 (316)                             | 141 ± 7  | 153 ± 7 *  | 162 ± 7    | 147 ± 5    | 133 ± 5    | 115 ± 6    |
| <b>NA/STZ Mice</b>                  |          |            |            |            |            |            |
| Vehicle                             | 244 ± 19 | 428 ± 14   | 346 ± 25   | 301 ± 28   | 269 ± 27   | 268 ± 28   |
| Acarbose (5)                        | 238 ± 38 | 256 ± 30 * | 229 ± 21 * | 214 ± 23 * | 174 ± 27 * | 153 ± 20 * |
| 1 (31.6)                            | 209 ± 18 | 320 ± 32 * | 251 ± 33 * | 224 ± 33   | 179 ± 25 * | 173 ± 22 * |
| 2 (100)                             | 212 ± 30 | 299 ± 27 * | 244 ± 30 * | 216 ± 25 * | 186 ± 22 * | 178 ± 19 * |
| 3 (316)                             | 221 ± 30 | 314 ± 24 * | 253 ± 31 * | 241 ± 28   | 190 ± 25 * | 172 ± 17 * |

<sup>a</sup> Each value is the mean ± SEM for six mice in each group. \*  $p < 0.05$  significantly different ANOVA followed by Dunnett's t test for comparison with respect to control group.

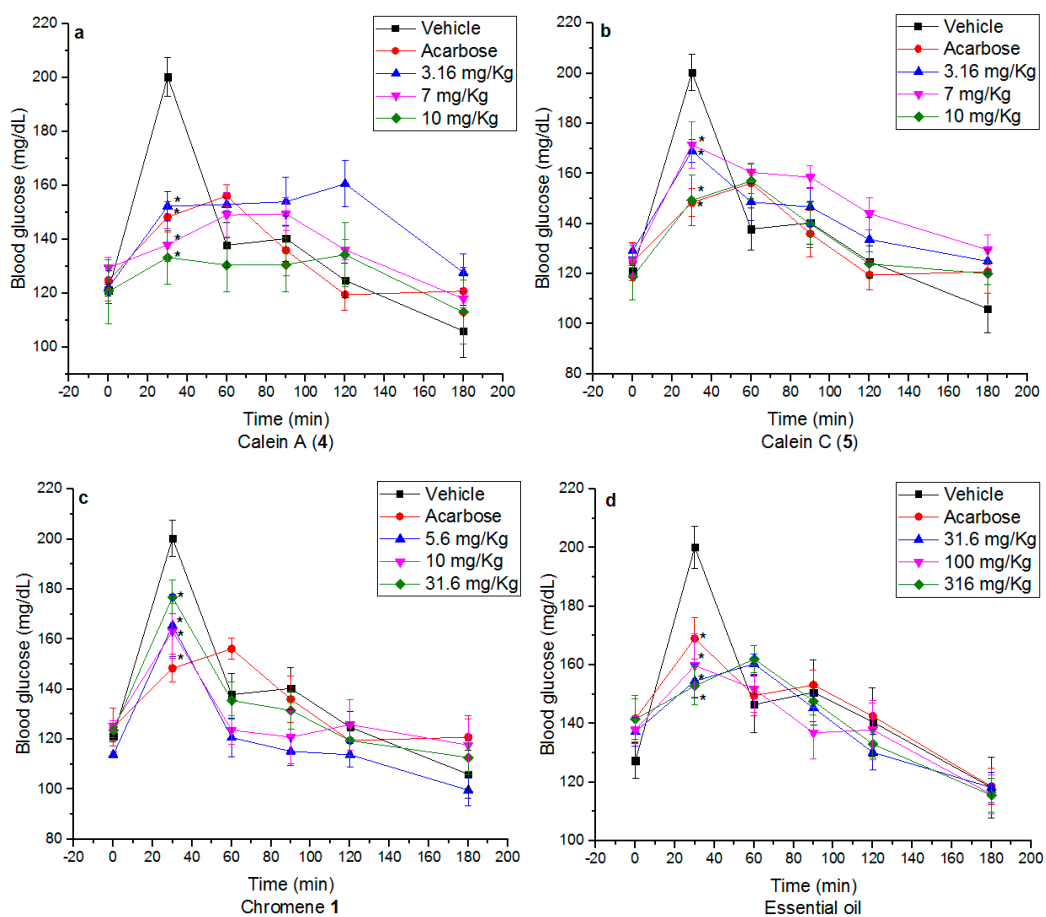

**Figure S1.** Effect of (a) calein A (4); (b) calein C (5) (c) chromene 1 and (d) Essential oil in normoglycemic mice, after a normal sucrose load (3 g/kg). \*  $p < 0.05$  significantly different ANOVA followed by Dunnett's  $t$  test for comparison with respect to vehicle.

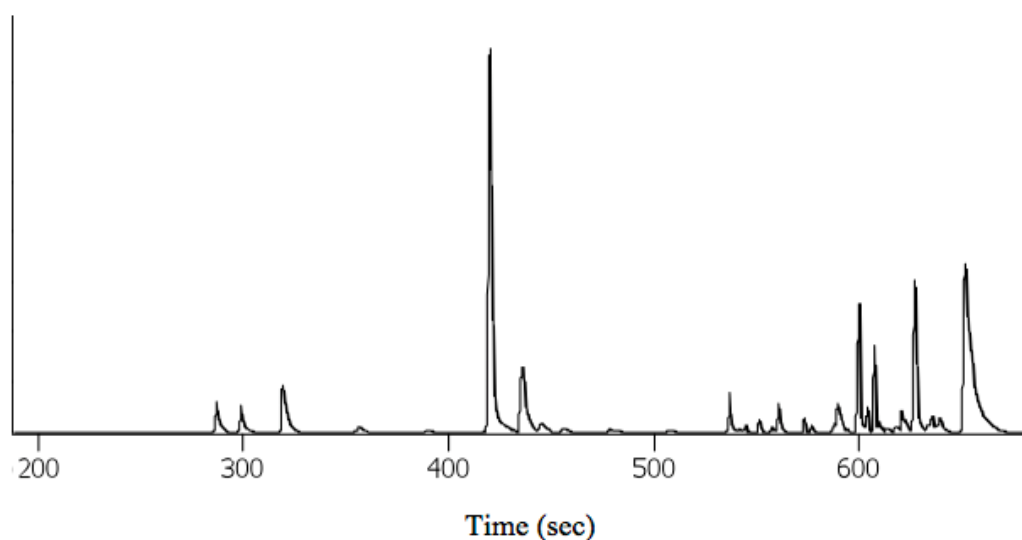

**Figure S2.** Total ion current chromatogram of the essential oil from *C. ternifolia*. For chromatographic (GC-MS) conditions, see the Experimental Section.

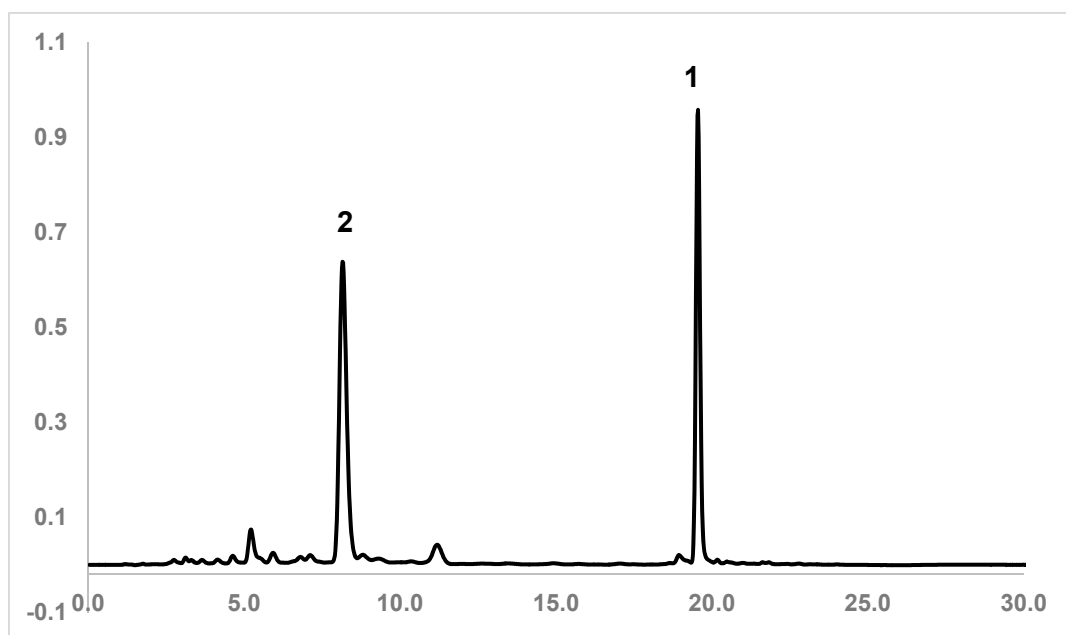

**Figure S3.** HPLC-DAD chromatogram of the chromene-rich fraction (CRF) from *C. ternifolia* aqueous extract; detection wavelength 265 nm. For chromatographic conditions, see the Experimental Section.



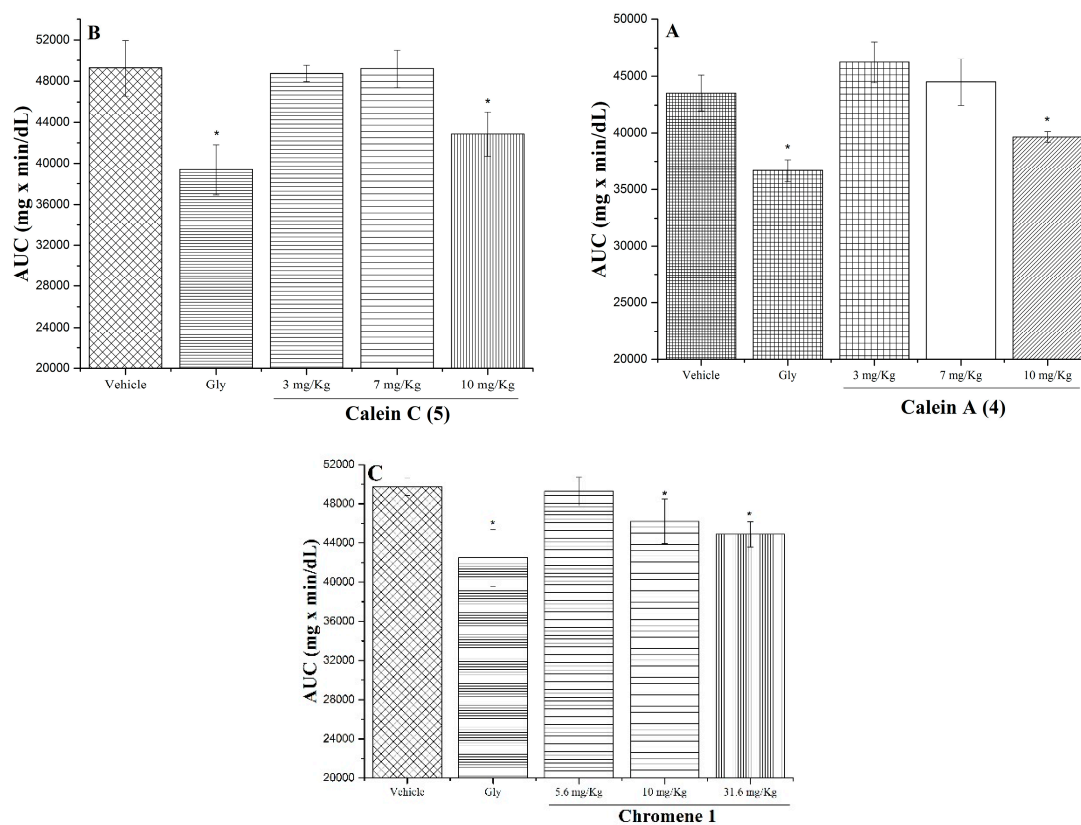

**Figure S4.** Hypoglycemic action of A) calein A (4), B) calein C (5) and C) chromene 1 in normoglycemic mice. AUC: area under the curve, Gly: glibenclamide. Each bar represents the mean  $\pm$  SEM for 6 mice in each group. \*  $p < 0.05$ , significantly different ANOVA followed by Dunnett *post hoc* test for comparison with respect to vehicle control.

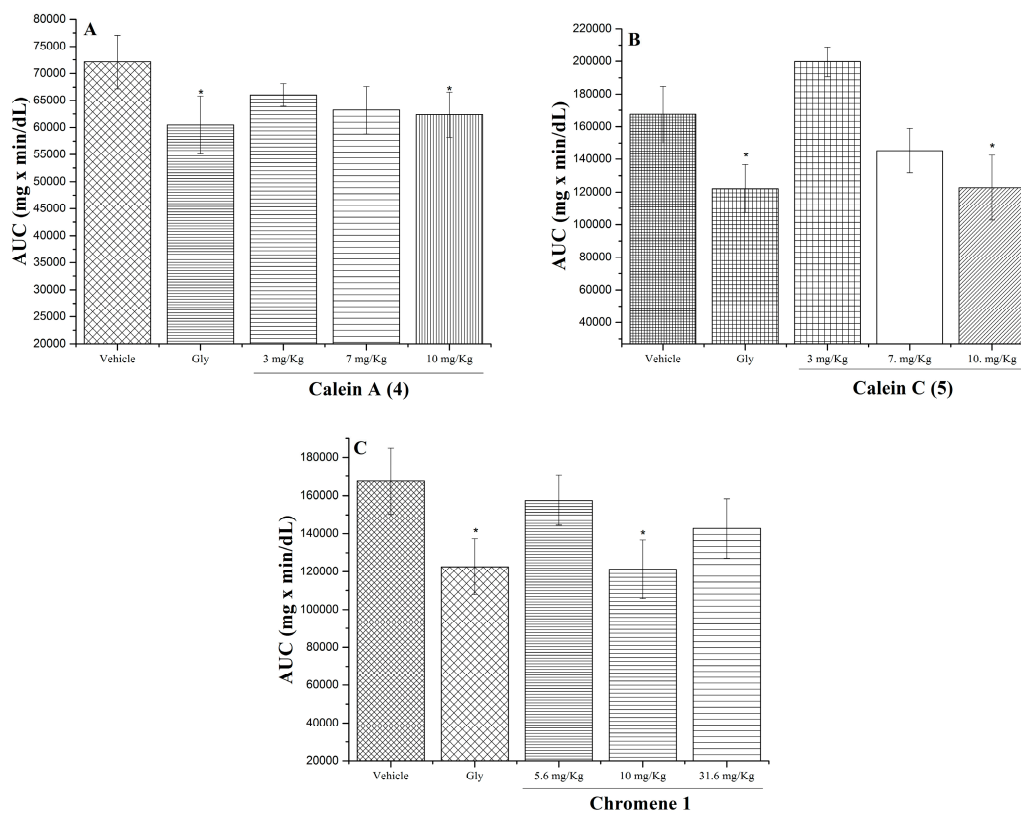

**Figure S5.** Hypoglycemic action of A) calein A (4), B) calein C (5) and C) chromene 1 in NA-STZ-treated mice. AUC: area under the curve [(mg/dL) x min], Gly: glybenclamide. Each bar represents the mean ± SEM for 6 mice in each group. \* $p < 0.05$ , significantly different ANOVA followed by Dunnett *post hoc* test for comparison with respect to vehicle control.
